# Supplementary material
Source: PubMed Central journal article supplement (PMC8820445)
Supplement: NIHMS1759986-supplement-1.pdf [file NIHMS1759986-supplement-1.pdf]

**Supplemental Table 1: Patient cohort characteristics**

| Characteristics                            | Cohort 1         |                   |                   | Cohort 2         |                   |                 |
|--------------------------------------------|------------------|-------------------|-------------------|------------------|-------------------|-----------------|
|                                            | HC               | T1D               | RRMS              | HC               | T1D               | RRMS            |
| <b>Subject N</b>                           | 62               | 104               | 121               | 19               | 15                | 20              |
| <b>Age median (range)</b>                  | 31<br>(22-47)    | 42<br>(12-76)     | 42<br>(19-75)     | 43<br>(23-58)    | 34<br>(26-41)     | 42.5<br>(27-57) |
| <b>Female</b>                              | 34/62<br>(54.8%) | 66/104<br>(63.5%) | 85/121<br>(70.2%) | 12/19<br>(63.2%) | 6/15<br>(40%)     | 13/20<br>(65%)  |
| <b>Statistical Analysis: Age</b>           |                  | <i>p</i> < 0.0001 | <i>p</i> < 0.0001 |                  | <i>p</i> = 0.0006 | <i>NS</i>       |
| <b>Sex</b>                                 |                  | <i>NS</i>         | <i>p</i> = 0.0393 |                  | <i>NS</i>         | <i>NS</i>       |
| <b>Overlap with Cohort 1</b>               |                  |                   |                   | 2/19             | 0/15              | 15/20           |
| <b>Clinical measures</b>                   |                  |                   |                   |                  |                   |                 |
| <b>Disease duration (yrs) mean (range)</b> | -                | 23.6<br>(1.2-55)  | 8.2<br>(0-32.4)   | -                |                   | 9.1<br>(0-29.4) |
| <b>Active MS Flare</b>                     | -                | -                 | 18/121<br>(14.9%) | -                | -                 | 19/20<br>(95%)  |
| <b>DMT*</b>                                | -                | -                 | 51/121<br>(42.1%) | -                | -                 | 16/20<br>(80%)  |

\*DMT = natalizumab, glatiramer acetate, dimethyl fumarate, interferon beta-1a and 1b; NS, not significant. P values are from one-way ANOVA (age) and chi-squared (sex).

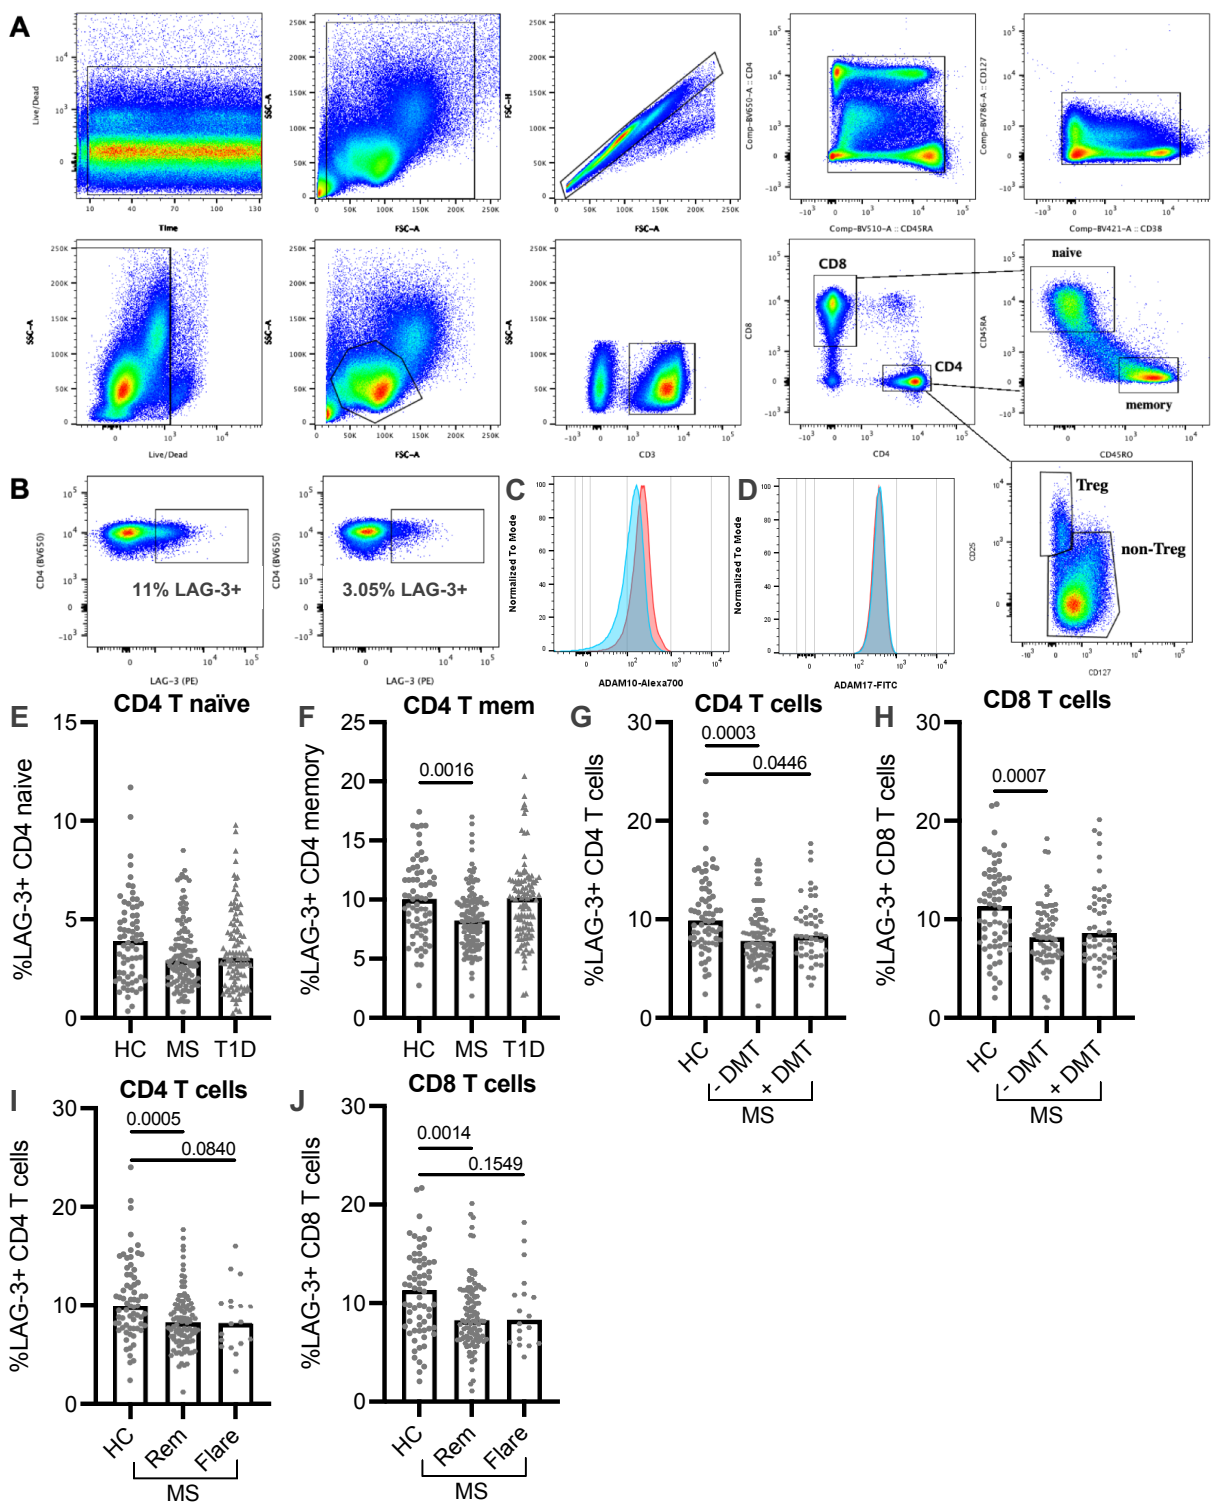

**Supplemental Figure 1.** Gating strategy for T cell subsets, LAG-3, ADAM10 and ADAM17 expression, frequency of LAG-3+ naïve and memory CD4 T cells, and MS subjects stratified by therapy and disease activity. (A) Gating strategy for CD3+ CD4+ and CD8+ T cells, memory (CD45RA-CD45RO+), naïve (CD45RA+CD45RO-), regulatory CD4 T cells (CD25+CD127low) and conventional CD4 T cells (CD25-CD127low). (B) Representative gating for frequency of LAG-3+ CD4 T cells. Representative histogram of ADAM10 (C) and ADAM17 (D) in resting CD4 T cells (HC red; RRMS blue). Frequency of LAG-3+ CD4 (E) naïve (CD45RA+CD45RO-) and (F) memory (CD45RA-CD45RO+) T cells from HC (69), T1D (104), and RRMS (121) subjects. LAG-3+ frequency in CD4 and CD8 T cells when stratifying RRMS subjects by treatment with disease-modifying therapies (DMT, 51) (G, H) and disease activity (18 flares) (I, J). Lines shown are median, and *p* values are shown after a one-way ANOVA. Results shown from 25 independent experiments

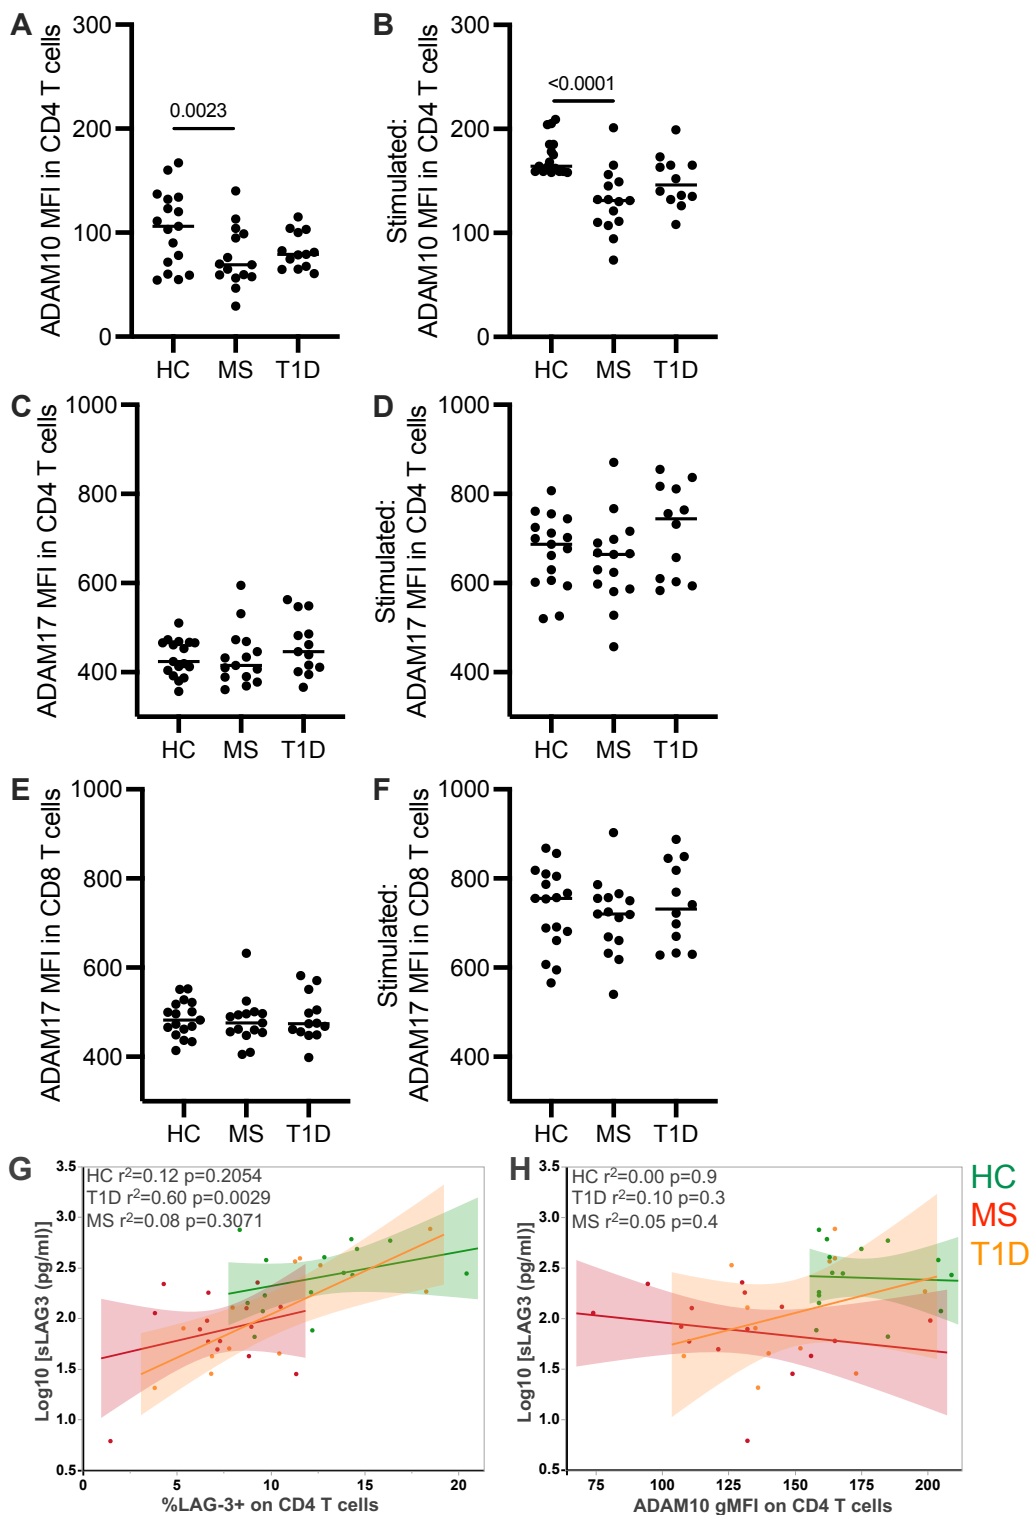

**Supplemental Figure 2.** ADAM10 and ADAM17 expression on T cells. The gMFI of ADAM10 (A) before and (B) after a 48-hour TCR stimulation in CD4 T cells. The geometric MFI of ADAM17 before and after stimulation in (C, D) CD4 and (E, F) CD8 T cells. (G) Correlation between surface LAG-3 expression and sLAG3 concentration after TCR stimulation in CD4 T cells (all subjects  $p < 0.0001$ ,  $r^2 = 0.4150$ ). (H) Correlation between CD4 ADAM10 gMFI and sLAG3 concentration after TCR stimulation (all subjects  $p = 0.0490$ ,  $r^2 = 0.0093$ ). Results from two independent experiments, HC (green)  $n = 17$ , RRMS (red)  $n = 15$ , and T1D (orange)  $n = 13$ . Lines shown are median, and p-values are shown after a one-way ANOVA (A-F) or a Spearman correlation test (G, H).

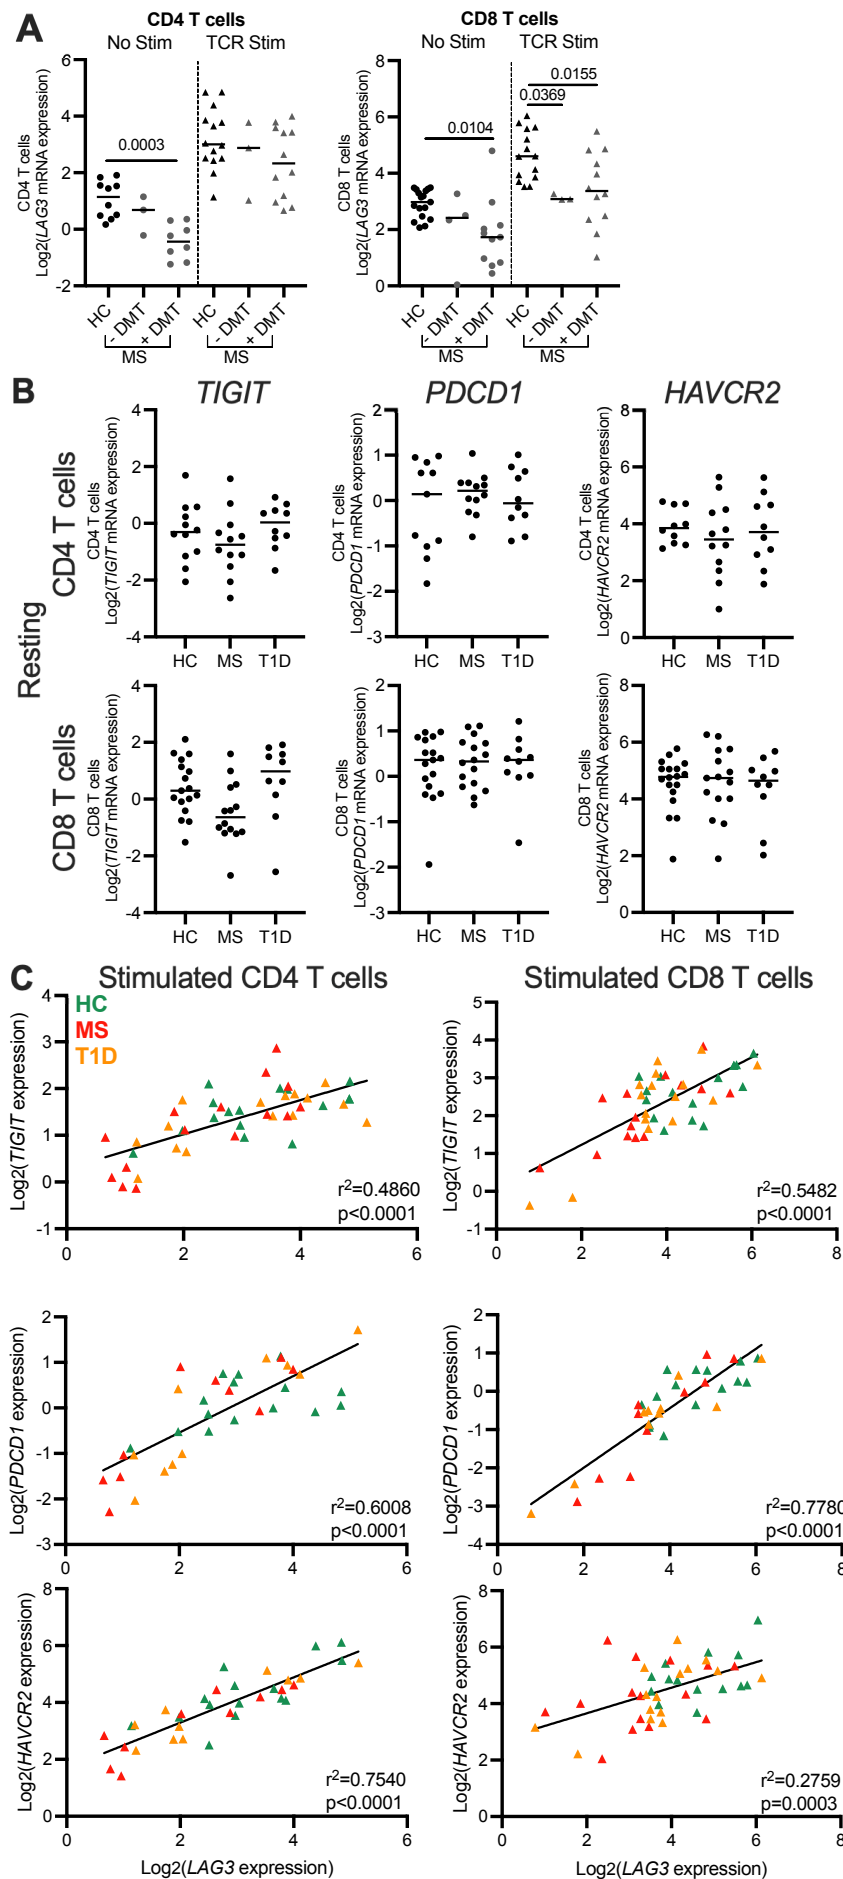

### Supplemental Figure 3.

Transcriptional expression of additional inhibitory receptors in RRMS and T1D. (A) *LAG3* mRNA expression in CD4 and CD8 T cells stratified by RRMS subjects taking disease-modifying therapies (DMT, 4). (B) In resting CD4 (top) and CD8 T cells (bottom) *TIGIT*, *PDCD1*, and *HAVCR2* mRNA levels were not different in RRMS and T1D subjects. (C) In CD4 and CD8 T cells, *LAG3* mRNA levels positively correlate with *TIGIT* (top), *PDCD1* (middle) and *HAVCR2* (bottom) expression after TCR stimulation. qRT-PCR for *HAVCR2*, *PDCD1* and *TIGIT* was normalized to the ribosomal gene *RPL36A* and reported relative to a Jurkat cell line. HC green, n=20; RRMS red, n=20; T1D orange, n=15. Results shown are from three independent experiments. Lines shown are median, and *p* values are shown after a one-way ANOVA. Linear regressions are shown with Pearson correlation coefficient.
